## **Derivation of ringed seal (*Phoca hispida*) induced multipotent stem cells**

Violetta R. Beklemisheva<sup>1</sup>, Polina S. Belokopytova<sup>2</sup>, Veniamin S. Fishman<sup>2,3</sup>, Aleksei G. Menzorov<sup>2,3\*</sup>

\* Corresponding author: Aleksei G. Menzorov, [menzorov@bionet.nsc.ru](mailto:menzorov@bionet.nsc.ru)

<sup>1</sup>Institute of Molecular and Cellular Biology of the Siberian Branch of the Russian Academy of Sciences, Novosibirsk, Russia

<sup>2</sup>Institute of Cytology and Genetics of the Siberian Branch of the Russian Academy of Sciences, Novosibirsk, Russia

<sup>3</sup>Novosibirsk State University, Novosibirsk, Russia

## Abstract

Induced pluripotent stem (iPS) cells have been produced just for a few species among order Carnivora: snow leopard, Bengal tiger, serval, jaguar, cat, dog, ferret, and American mink. We applied the iPS cell derivation protocol to the ringed seal (*Phoca hispida*) fibroblasts. The resulting cell line had the expression of pluripotency marker gene *Rex1*. Differentiation in embryoid body-like structures allowed us to register expression of *AFP*, endoderm marker, and *Cdx2*, trophoderm marker, but not neuronal (ectoderm) markers. The cells readily differentiated into adipocytes and osteocytes, mesoderm cell types of origin. Transcriptome analysis allowed us to conclude that the cell line does not resemble human pluripotent cells, and, therefore, most probably are not pluripotent. Thus, we produced ringed seal multipotent stem cell line capable of differentiation into adipo- and osteocytes.

## Keywords

reprogramming, pluripotency, Carnivora, iPS cells, *Rex1*, adipocyte differentiation

## INTRODUCTION

Order Carnivora consists of two suborders: Caniformia and Feliformia. It includes domestic animals, that are used for disease modeling, fur-bearing animals, such as mink, marine mammals, and other species. Derivation of induced pluripotent stem (iPS) cells could allow insights into pluripotency and embryonic development of these species, as well as the development of new disease models. Currently, pluripotent cells were produced from several Carnivora species: dog (Luo et al., 2011; Baird et al., 2015; Lee et al., 2011; Vaags et al., 2009; Shimada et al., 2010; Whitworth et al., 2012; Koh et al., 2012; Tsukamoto et al., 2018), snow leopard (Verma et al., 2012), Bengal tiger, serval, jaguar, and cat (Verma et al., 2013; Dutton et al., 2019; Gómez et al., 2010), ferret (Gao et al., 2020), and American mink (Menzorov et al., 2015).

Marine mammals represent the basal Carnivora group. As their embryos are unavailable, iPS cells would expand our knowledge of embryonic development and differentiation. We attempted to generate ringed seal (*Phoca hispida*) iPS cells. We were able to produce multipotent stem cells that expressed pluripotency and mesenchymal stem cell marker *Rex1* and were able to differentiate them into mesoderm cell types, adipo- and osteocytes.

## MATERIALS AND METHODS

### **Production of ringed seal fibroblasts**

Primary fibroblasts of the ringed seal were obtained from lung necropsy. Tissue samples from wild female were collected during aboriginal quota sealing in the coastal waters of the Bering Sea (Mechigmen bay, Chukotka Autonomous Okrug, Russia). To establish primary fibroblast cell culture, we used a conventional technique (Stanyon, Galleni, 1991). The fibroblast culture medium consisted of a-MEM supplemented with 15 % fetal bovine serum (FBS), 1x MEM non-essential amino acids solution, 1x GlutaMAX supplement, and 1x penicillin-streptomycin (Thermo Fisher Scientific, USA).

### **Production of ringed seal multipotent stem cell line**

To reprogram the ringed seal fibroblasts we used lentiviral vectors LeGO (<http://www.lentigo-vectors.de/vectors.htm>) with *EGFP* and human reprogramming transcription factors: *OCT4*, *SOX2*, *C-MYC* and *KLF4*, courtesy of Dr. Sergei L. Kiselev, Moscow. We used the previously published protocol (Menzorov et al., 2015) with minor modifications. Lentiviruses were produced in the Phoenix cell line using Lipofectamine 3000 (Thermo Fisher Scientific, USA). The multiplicity of infection was estimated as 5.1 using *EGFP* lentiviral vector (Beklemisheva, Menzorov, 2018). Fibroblasts at passage 4 ( $3 \times 10^5$  cells,  $30 \times 10^3$  cells/cm<sup>2</sup>) plated the day before were transduced with viruses containing four reprogramming transcription factors: 50 % virus supernatant, 50 % fibroblast culture medium without antibiotics with heat-inactivated FBS, and 10 µg/ml Polybrene. Transduction was performed for two consecutive days. Cells were passaged onto a 6 cm cell culture dish coated with 0.1 % gelatin on mouse strain CD-1 feeder cells on day 5. From day 6 we used iPS cell culture medium: a-MEM supplemented with 20 % ES cell qualified FBS, 1x MEM non-essential amino acids solution, 1x GlutaMAX supplement, 0.1 mM 2-mercaptoethanol, 1x penicillin-streptomycin, and 10 ng/ml bFGF recombinant human protein (Thermo Fisher Scientific, USA). From day 6 until day 12 the medium was changed once in two days with the addition of 1 mM valproic acid (Sigma-Aldrich, USA). On day 23 colonies were picked up and expanded on the feeder. The passage was performed with 0.25 % Trypsin-EDTA (Thermo Fisher Scientific, USA). All cell cultures were maintained at 37°C and 5 % CO<sub>2</sub>.

Multipotent stem cell derivation was performed at the Collective Center of ICG SB RAS “Collection of Pluripotent Human and Mammalian Cell Cultures for Biological and Biomedical Research” (<http://ckp.icgen.ru/cells/>; [http://www.biores.cytogen.ru/icg\\_sb\\_ras\\_cell/](http://www.biores.cytogen.ru/icg_sb_ras_cell/)).

All animal studies were undertaken with prior approval from the Ethics Committee on Animal and Human Research of the Institute of Molecular and Cellular Biology SB RAS, Russia (protocol No. 01/20 of 11 February 2020).

### **Cytogenetic analysis**

Cytogenetic analysis for fibroblasts was carried out on passage 7 and for multipotent stem cell line on passage 9. The preparation of metaphase chromosomes from fibroblasts was performed as previously described (Yang et al., 1999; Graphodatsky et al., 2000; Graphodatsky et al., 2001). GTG-banding of metaphase chromosomes was done according to a previously published protocol (Seabright, 1971). For each cell line, averages of 50 conventionally stained by Giemsa metaphase plates were analyzed. Digital images were captured using the VideoTest system (Zenit, St. Petersburg, Russia) with a charge-coupled device (CCD) camera (Jenoptik, Jena, Germany) mounted on a Zeiss microscope Axioscope 2 (Zeiss, Oberkochen, Germany). Metaphase spreads images were edited in Corel Paint Shop Pro Photo X2 (Corel, Ottawa, Canada). Chromosomes of the ringed seal (*P. hispida*) were arranged according to the current nomenclature (Graphodatsky et al., 2020).

### **Multipotent stem cell differentiation**

Differentiation into embryoid body-like (EB-like) structures was performed in EB differentiation medium, the same composition as iPS cell culture medium but with 20 % FBS instead of ES qualified FBS and without bFGF. Cells were passaged into 1 % agarose coated cell culture plates to prevent attachment. The medium was changed every second day for 31 days. On day 5 part of EBs were plated onto 0.1 % gelatin-coated cell culture plates for osteocyte and adipocyte differentiation. Osteocyte differentiation was carried out in EB differentiation medium; adipocyte differentiation in a similar adipocyte differentiation medium supplemented with 10 % knockout serum replacement (KSR) (Thermo Fisher Scientific, USA) instead of FBS from day 6.

### **Cytochemical staining**

Cells were fixed by 4 % paraformaldehyde for 20 min and washed with PBS. Adipocytes were stained with 0.7 % Sudan black B in propylene glycol, washed twice with 0.85 % propylene glycol, and washed multiple times with PBS. Calcification was shown by staining with alizarin red (Sigma-Aldrich) according to the manufacturer's recommendations. Staining was analyzed

on Zeiss Observer.Z1 fluorescent microscope with AxioCam HRm 3 CCD-camera (Zeiss, Germany). Digital images were analyzed using the ZEN 2 starter (Zeiss, Germany) software.

### **DNA isolation**

Genomic DNA was isolated from cells using a PCR buffer with nonionic detergents (PBND), which was adapted from a protocol from Perkin Elmer Cetus (Higuchi, 1989).

### **RNA isolation and cDNA synthesis**

RNA was isolated using Aurum Total RNA mini kit (Bio-Rad, USA). Genomic DNA was removed using *DNaseI* (Fermentas, USA), 0.4 micrograms of total RNA were used for cDNA synthesis by First Strand cDNA Synthesis kit (Thermo Fisher Scientific, USA).

### **Primer design and PCR**

We used Primer-BLAST software (Ye et al., 2012) to design primers for mink *Rex1* and canine *Cdx2*: qNvRex1F 5'-AAA GCG TTT TCC ACA CCC CT-3', qNvRex1R 5'-CTC CTT GTC CAT GGT CCT CG-3', CfCdx2E1F 5'-GGA ACC TGT GCG AGT GGA TG-3', and CfCdx2E3R 5'-TTC CTT TCC TTG GCT CTG CG-3'.

We used previously published primer sequences for human-specific *KLF4* transgene (Mathew et al., 2010), *Mycoplasma* detection (Choppa et al., 1998), mink *Hprt1* (Rouvinen-Watt et al., 2012), mink *Oct4* (Menzorov et al., 2015), and human *AFP* (Huangfu et al., 2008).

PCR was performed using BioMaster HS-Taq PCR-Color (2x) (Biolabmix, Russia) in 10  $\mu$ L reaction volume.

### **De novo transcriptome assembly and dataset annotation**

We performed non-stranded & polyA-selected mRNA library preparation and PE100 sequencing on DNBSEQ at BGI (People's Republic of China). The number of reads was 62,390,350, Q20 rate – 95.77 %, and GC rate – 50.78 %. The raw sequence data are available in NCBI BioProject repository, accession number: PRJNA718133, link: <https://www.ncbi.nlm.nih.gov/bioproject/PRJNA718133>.

RNA-seq read quality was assessed using FastQC (<https://www.bioinformatics.babraham.ac.uk/projects/fastqc/>). The RNA was isolated from cell culture containing mouse feeder cells. To exclude reads originating from feeder transcripts we aligned reads to the mouse genome using bowtie2 (Langmead, Salzberg, 2012) with default

parameters. All aligned reads were excluded from the following analysis. *De novo* transcriptome assembly was done with Trinity (v. 2.11.0) using default settings (Grabherr et al., 2011; Haas et al., 2013). Coding regions of the assembled transcripts were predicted using TransDecoder (v. 5.5.0) with default settings (Haas et al., 2013). We used the Basic Local Alignment Search Tool (BLAST) and the Swiss-Prot database to assign functional annotations (Altschul et al., 1990; Camacho et al., 2009). We assessed the quality of transcriptome assembly using BUSCO (Seppey et al., 2019) and Trinity scripts. The following filtration was done using homemade python scripts. We used StringTie for generating transcript quantifications with default options (Pertea et al., 2015). RNA-seq data analysis was performed using <https://usegalaxy.org/> server (Afgan et al., 2018) and Computational Cluster of the Novosibirsk State University (Russia).

### **Analysis of endo- and exogenous expression of *OCT4*, *KLF4*, *SOX2*, and *c-MYC* genes**

We extracted all ringed seal transcripts encoding *OCT4*, *KLF4*, *SOX2*, and *c-MYC* using BLAST against the Swiss-Prot database. For this analysis, we used transcriptome assembly obtained from unfiltered reads (i.e. possibly containing mouse feeder transcripts), to allow capturing of transcripts conserved between mouse, human, and ringed seal. We found that each of the target genes was represented by multiple Trinity transcripts. We manually annotated all obtained transcripts using BLAST nucleotide alignment and BLAST protein alignment against NCBI nucleotide or protein collections. For three genes (except *Sox2*), we found that some transcripts showed better alignment to Carnivora orthologues, whereas other transcripts had better alignment to primates orthologues. These results were consistent between nucleotide and protein alignments and therefore allowed us to classify transcripts by organism of origin.

To qualitatively estimate expression levels of the target genes we used bowtie2 (Langmead, Salzberg, 2012) to align reads to assembled transcripts of ringed seal and human orthologues. All reads aligned to both human and ringed seal references were removed, and the remaining read counts were used as a proxy of gene expression.

### **Genome-wide comparison of gene expression between cell types and species**

We obtained gene expression quantification files from ENCODE using batch download with a filter (organism: human; assay: RNA-seq; file format: tsv). All files were processed using homemade Python scripts to obtain FPKM values. We filtered out genes that do not have one-

to-one orthologues between mouse, human, and ringed seal. For the remaining genes, we only kept the top 10% of genes that showed the highest FPKM standard deviation values across samples. The resulting gene expression matrix (1843 genes) was used to compute Spearman's R correlation coefficient between each pair of samples.

## RESULTS

### Multipotent stem cell derivation and differentiation

The experiment outline is shown in Figure 1A. We aimed to produce iPS cells from primary ringed seal fibroblasts and used the following human reprogramming transcription factors: OCT4, SOX2, C-MYC, and KLF4. On day 26 after transduction, there were colonies with different morphology. Two colonies were picked up and expanded (Fig. 1B). One of them, iPHIS1, gave rise to cells that grew in a monolayer (Fig. 1C,D), the other had fibroblast morphology after the passage and was discarded. Overgrown culture formed "bubbles" (Fig. 1E) that later detached and floated as cyst-like structures resembling canine embryos (Hayes et al., 2008). The cells continue to divide after passage 15.

We attempted to differentiate iPHIS1 cells into derivatives of the three germ layers. Solid and cyst-like EB-like structures were formed after passage to non-adhesive culture plates (Fig. 1F). Their gene expression analysis is described below. Adipo- and osteogenic differentiation was successfully performed in the adipo- and EB differentiation media, respectively (Fig. 1G,H). Interestingly, there was some calcification in the adipocyte differentiation medium (data not shown).

### Cytogenetic analysis

We performed the cytogenetic analysis of the ringed seal (*P. hispida*) primary fibroblasts and iPHIS1 cells. Fibroblasts had 32 chromosomes, typical for this species (Arnason, 1974), XX (n = 50) (Fig. 1I) with 15.7 % polyploid cells. The iPHIS1 cells (n = 50) had 32 (n = 47), 33 (n = 2), and 35 (n = 1) chromosomes, with 5 % polyploid cells. We had not revealed a difference in the pattern of GTG-banding between karyotypes of the primary fibroblasts and iPHIS1 cells. We conclude that the iPHIS1 karyotype is stable. A propensity for the emergence of tetraploid cells in pinniped fibroblast cultures has been noted previously (Árnason, 1974). We also observed a certain proportion of tetraploid cells in primary fibroblast cell lines established from different pinniped species (Beklemisheva et al., 2020). This feature depended on the passage number, but the species karyotypes were found to be stable in diploid cells.

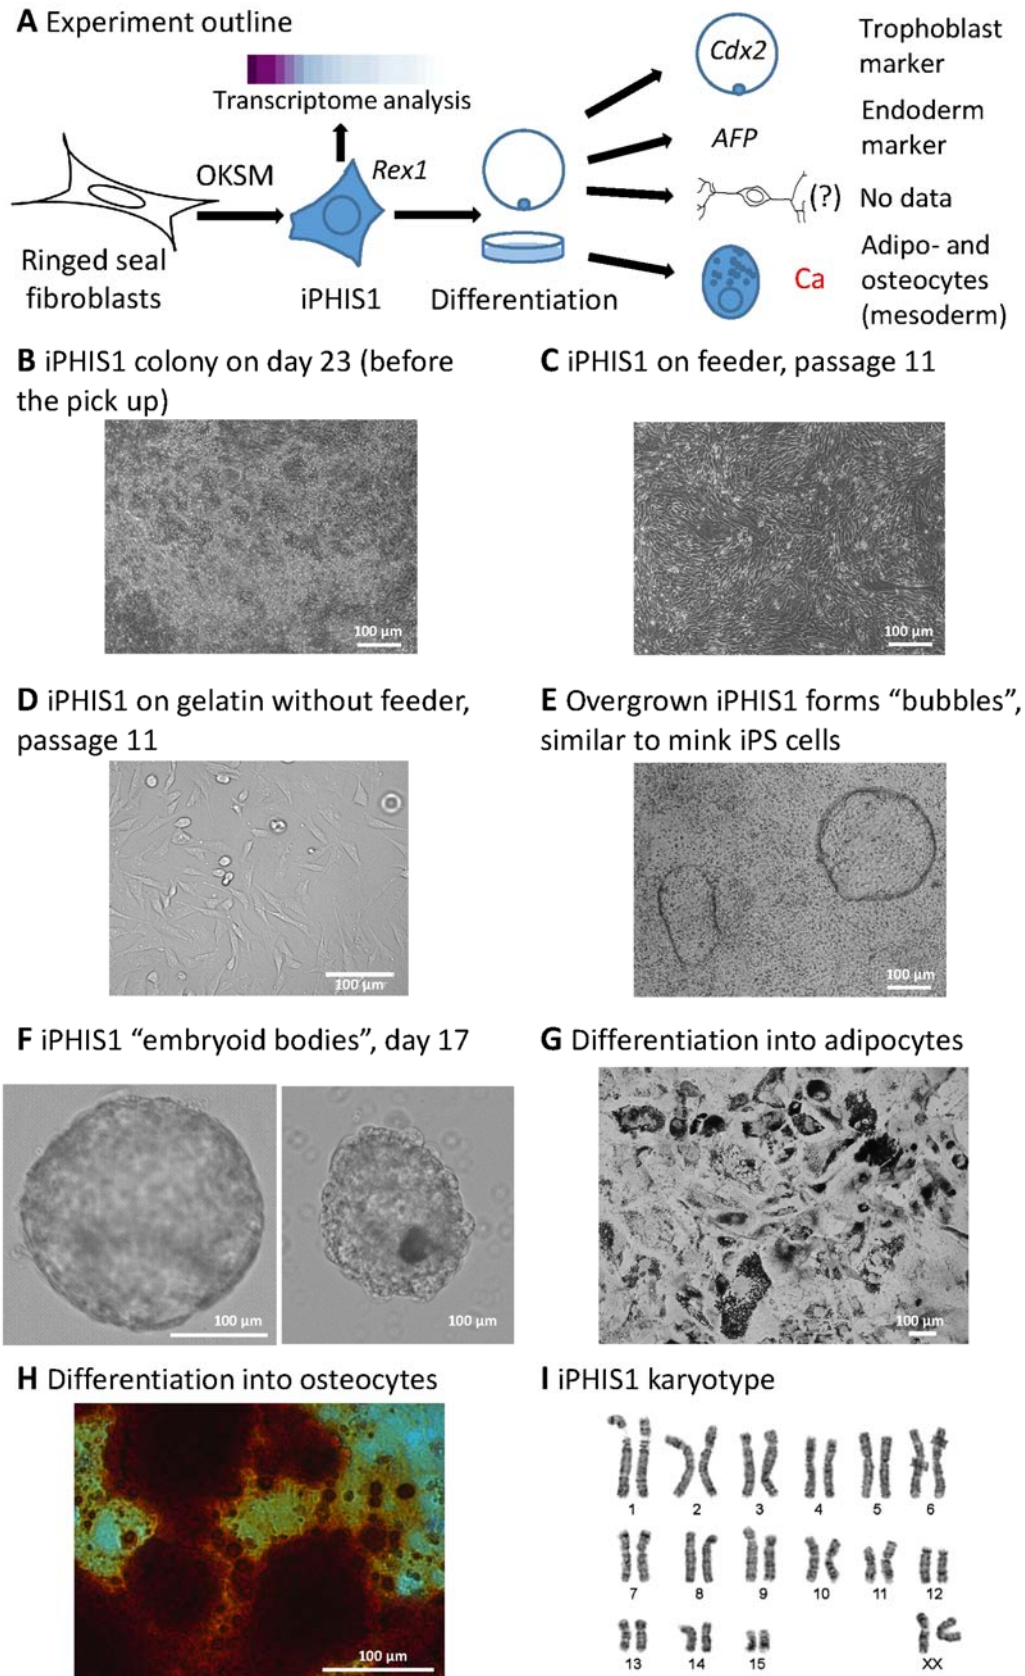

**Fig. 1.** Derivation, colony morphology, differentiation, and karyotype of ringed seal induced multipotent stem cells.



## Gene expression pattern

First, we applied RT-PCR analysis of gene expression. We were able to show the expression of one of the key pluripotency markers *Rex1* (*Zfp42*) as well as *Oct4* in iPHIS1 cells by RT-PCR (Fig. 2A). Analysis of EB-like structures revealed the expression of *AFP*, endoderm marker, and *Cdx2*, trophoblast marker (Fig. 2B). We also analyzed DNA samples of ringed seal fibroblasts and iPHIS1 cells; they were negative for *Mycoplasma* contamination.

We next employed transcriptome sequencing to profile genome-wide gene expression in iPHIS1 cells. To avoid contamination originating from mouse feeder cell transcripts, we filtered out all reads aligned to the mouse genome (8.5 % of reads) and subjected the remaining dataset to *de novo* transcriptome assembly. This resulted in a draft assembly composed of 170,758 genes (209,671 transcripts) (<http://dx.doi.org/10.17632/5mkvk5yc4w.1>). BUSCO orthologues analysis showed that 67 % out of the Mammalia BUSCO database were present in this draft assembly, confirming its high quality.

We then used the Swiss-Prot protein database to annotate obtained Baikal seal genes, which allowed us to find orthologues for 31,194, containing 12,228 unique gene names (<http://dx.doi.org/10.17632/5mkvk5yc4w.1>).

We used obtained transcriptomic data to profile the expression of some marker genes in iPHIS1 cells (<http://dx.doi.org/10.17632/5mkvk5yc4w.1>). We confirmed a relatively high level of *Rex1* expression. **There was not *Nanog* in the** Trinity transcripts. We aligned reads to *P. vitulina Nanog* and were able to find just 44 reads. We presume that those transcripts represent a slight DNA contamination, but not the *Nanog* expression. As we introduced human *OCT4*, *KLF4*, *SOX2*, and *c-MYC* genes to reprogram fibroblasts into iPS cells, we decided to check whether those genes are expressed or silenced. Lentiviral transgenes are silenced in pluripotent stem cells, thus their silencing would suggest passing through pluripotency. We performed an analysis of endo- and exogenous expression of their transcripts and found expression of both human transgenes and ringed seal orthologues of *Oct4* (*Pou5f1*), *Klf4*, and *c-Myc*. As for *Sox2*, we found that Trinity failed to assemble a ringed seal orthologue. Manual analysis of reads aligned to *P. vitulina Sox2* reference showed the presence of ringed seal transcripts, although expressed at the relatively low level compared to exogenous human *SOX2* gene. Consistent with that, all isoforms of the *Sox2* gene assembled by Trinity showed 100% identity to the human *Sox2* gene. Thus, there were no signs of transgene silencing.

Next, we performed a genome-wide comparison of expression patterns observed in iPHIS1 cells and various human cell types with added mouse ES cell line E14. For this analysis,

we used all available human RNA-seq data from ENCODE, 288 samples. We accessed the similarity of gene expression profiles using Spearman's correlation coefficient (Fig. 2C). To test the applicability of this approach, we performed the same analysis comparing mouse ES cell line E14 transcriptome data with the same human cell lines and tissues (Fig. 2D). As expected, mouse ES cells showed the highest similarity to human pluripotent cells. In contrast, iPHIS1 expression shows the highest correlation with several cancer cell lines, as well as with foreskin keratinocytes, but not with pluripotent cells. These data argue against the establishment of pluripotency in iPHIS1 cells.

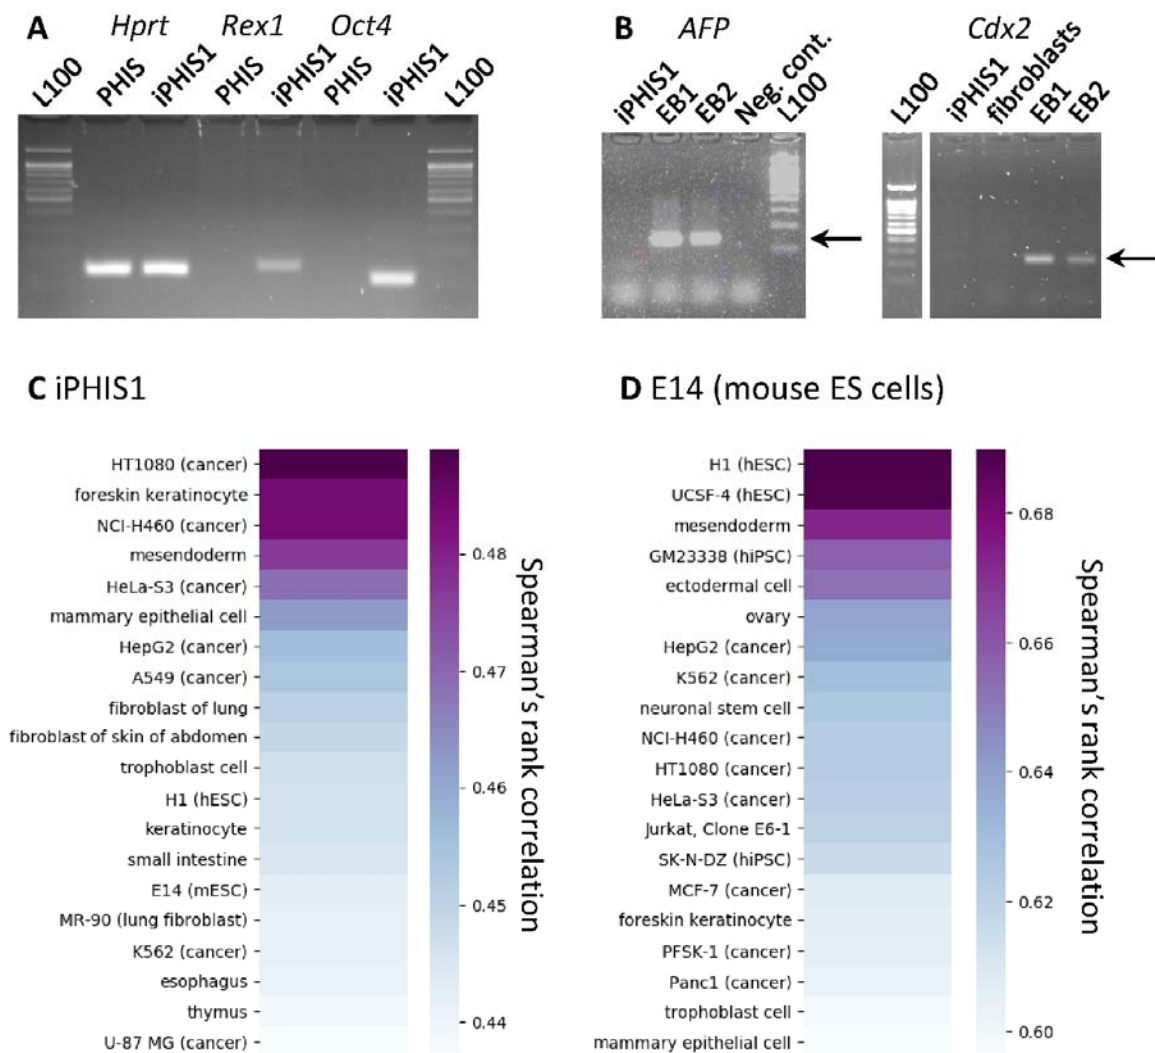

**Fig. 2.** Gene expression in iPHIS1 and Spearman's rank correlation coefficients between iPHIS1 expression pattern and human samples. (A) Gene expression in iPHIS1 and PHIS fibroblasts. (B) Gene expression in iPHIS1 embryoid body-like structures. (C) Top 20 Spearman's correlation

coefficients of iPHIS1 and human ENCODE data with addition of mouse E14 ES cell line. (D) Top 20 Spearman's correlation of mouse ES cell line E14 and human ENCODE data.

## DISCUSSION

Transcription factors Oct4, Sox2, c-Myc, and Klf4 were used to generate iPS cells from a variety of Carnivora species. We decided to produce iPS cells from the ringed seal (*P. hispida*), the basal representative of the suborder Caniformia. Only one cell line expressed pluripotency marker genes *Rex1* and *Oct4*. Its morphology differed from mouse, human, and mink iPS cells (Fig. 1C,D). Similar to American mink iPS cells, overgrown cell culture formed “bubbles” (Fig. 1E) that later unfastened and floated as cysts. We differentiated iPHIS1 cells into EB-like structures to analyze differentiation potential (Fig. 1F). Cyst-like EBs resembled canine embryos (Hayes et al., 2008), expressed endoderm marker *AFP* and trophoblast marker *Cdx2* (Fig. 2B). EBs plated on gelatin efficiently differentiated into mesoderm derivatives: adipo- and osteocytes. We were not able to show ectoderm differentiation, as *Tubb3* marker gene was expressed in both iPHIS1 and EBs (data not shown). The presence of *Tubb3* transcript in undifferentiated pluripotent stem cells is in accordance with our previous data on mouse ES cells (Menzorov et al., 2019). Ability to differentiate into adipo- and osteocytes allows us to presume that iPHIS1 cells are at least multipotent.

The expression of a trophoblast marker upon differentiation, *Cdx2*, was rather unexpected, though trophoblast differentiation was shown for human and mouse primed pluripotent stem cells (Xu et al., 2002; Kojima et al., 2014) and canine iPS cells (Luo et al., 2011; Wilcox et al., 2008). If iPHIS1 cells were pluripotent, differentiation into trophoblast would suggest a primed pluripotency state.

We used bFGF to derive and propagate the iPHIS1 cell line. Colonies with prospective morphology were not formed in the media supplemented with LIF or combination of LIF and bFGF. Canine pluripotent stem cells were produced with LIF (Luo et al., 2011; Baird et al., 2015; Lee et al., 2011; Vaags et al., 2009) or LIF and bFGF (Shimada et al., 2010; Whitworth et al., 2012; Koh et al., 2012; Tsukamoto et al., 2018). Also, cells were later cultured in the presence of LIF only (Whitworth et al., 2012). Other Carnivora species pluripotent cells include snow leopard (Verma et al., 2012), Bengal tiger, serval, jaguar, and cat (Verma et al., 2013; Dutton et al., 2019) cultured with LIF; cat cultured with LIF and bFGF (Gómez et al., 2010), and ferret cultured with bFGF (Gao et al., 2020). Interestingly, cat iPS cells required species-specific feline bFGF (Dutton et al., 2019), thus species-specific LIF or bFGF may be beneficial. We generated

American mink iPS cells without LIF or bFGF supplementation (Menzorov et al., 2015), though inactivated mouse embryonic fibroblasts secrete both growth factors. Different requirements of the iPS cell culture of various species indicate that different signaling pathways are activated. It leads to different pluripotency states, naïve, primed, or other, as additional distinct pluripotency states had been described recently. More high-quality transcriptome data may facilitate the distinction between various pluripotency states in different species.

Pluripotent stem cells of different pluripotency status also have distinctive morphology. For instance, American mink pluripotent stem cells form colonies unlike mouse and human naïve and primed cells (Menzorov et al., 2015). Thus, morphology and expression of several marker genes are not enough to determine whether cells are pluripotent or not.

Transcriptome analysis of iPHIS1 cells revealed that their expression pattern resembled some human cancer cell lines, keratinocytes, and mesodermal cells (Fig. 2C). Correlation of expression pattern of iPHIS1 and human pluripotent cells H1 and mouse E14 was slightly lower, although within the top quartile of all correlation coefficient values observed. Thus, transcriptome analysis allows concluding that iPHIS1 cells do not resemble human embryonic stem cells, as pluripotent stem cells were not among the closest by correlation. At the same time, this analysis was able to place mouse pluripotent cells close to human ones, thus this approach gives meaningful results.

Our data allows presuming that iPHIS1 cells are not pluripotent. The question remains, whether this cell line was produced by fibroblast reprogramming. If there was a pluripotent state, transgene silencing would be expected. Retroviral transgene silencing in pluripotent stem cells is a well-known phenomenon (Maherali et al., 2007; Wernig et al., 2007; Okita et al., 2007). The transcriptome data revealed expression of *Oct4*, *Klf4*, and *c-Myc* human transgenes comparable with their endogenous counterparts. As for *Sox2*, the endogenous expression was lower than that of the transgene. There are three main explanations. First, iPHIS1 cells were reprogrammed in an intermediate pluripotency state and/or to iPS cells and subsequently differentiated into multipotent stem cells. The pluripotency state stage was short and not enough to silence the lentiviral transgenes. Second, we directly reprogrammed ringed seal fibroblasts to multipotency. It was recently shown that *Oct4*, *Klf4*, *Sox2*, and *c-Myc* can reprogram somatic cells to a variety of cell types, including stromal ones (Schiebinger et al., 2019). Third, there is a possibility that a mesenchymal stem cell in a fibroblast population gave rise to iPHIS1, probably even without reprogramming. It would explain the adipo- and osteogenic differentiation of iPHIS1, as well as *Oct4* and *Rex1* expression. As for *AFP* and *Cdx2*

gene expression (endoderm and trophoblast markers, respectively), their expression may be a culture artefact or a property of mesenchymal stem cells in a given culture conditions, i.e. during EB-like differentiation. Also, there are some other cell types that can differentiate into adipo- and osteocytes, such as pericytes.

We produced only one ringed seal multipotent stem cell line, experiments for iPS cell derivation were not successful. Suboptimal culture conditions might be the main reason. ES cell qualified FBS batch are only tested for mouse ES cell growth support. Also, growth factor origin may be important. We used human bFGF, and for cat iPS cells only species-specific feline LIF was able to support pluripotency (Dutton et al., 2019). Growth factor concentration is an important factor as well. Ferret iPS cells were derived with human bFGF, but in 10x concentration compared to human iPS cells and this study (Gao et al., 2020). Different researchers used small molecules to enhance iPS cell derivation efficiency. In our experience, 2i inhibitors (PD0325901 and CHIR99021) and TGF- $\beta$  antagonist A83-01 caused substantial fibroblast death, thus we were not able to use them. Another way to increase efficiency is to use different transgenes and/or delivery vectors. We have recently shown that Sendai virus - based vector transgene expression level is superior to lentiviruses (Beklemisheva, Menzorov, 2018). Also, another set of reprogramming factors was successfully used to reprogram not only human, but ferret fibroblasts to pluripotency, OCT4, SOX2, KLF4, L-MYC, LIN28A, mp53DD, and 160 oriP/EBNA-1 (Gao et al., 2020).

## CONCLUSIONS

We produced ringed seal multipotent stem cells, capable of differentiation into mesoderm cell types, adipo- and osteocytes. We were able to show expression of endoderm (*AFP*) and trophoblast (*Cdx2*) markers after differentiation, but not ectodermal. Transcriptome analysis suggests that iPHIS1 cells do not resemble human or mouse pluripotent stem cells. Their differentiation profile suggests mesenchymal stem cell identity, though we do not have sufficient data to prove it by transcriptome analysis. The iPHIS1 could be used as a model cell line for ringed seal adipo- and osteogenesis studies.

## ACKNOWLEDGMENT

The reported study was funded by RFBR, project number 20-04-00369, and the Ministry of Education and Science of the Russian Federation, state project 0259-2021-0016.

Authors are thankful to Michael Zelensky, Alexey Ottoj, and the Community of the Chukotka Autonomous Region indigenous “Lorino” (Russian Federation) for assistance in the ringed seal tissue sample collection. The authors gratefully acknowledge the primary fibroblast cell culture of *P. hispida* provided by the “Molecular and Cellular Biology” core facility of the Institute of Molecular and Cellular Biology SB RAS (project 0310-2018-0011).

## CONFLICT OF INTERESTS

The authors declare that there is no conflict of interest.

## AUTHOR CONTRIBUTIONS

VRB obtained ringed seal fibroblasts and performed cytogenetic analysis. AGM produced and differentiated multipotent stem cells, performed RT-PCR gene expression analysis. PSB performed transcriptome analysis. VSF supervised transcriptome analysis. AGM carried out interpretations of the data and project coordination; AGM did most of the writing with contributions from VRB, PSB, and VSF. All authors read and approved the final manuscript.

## REFERENCES

1. Afgan E, Baker D, Batut B, Beek M, Bouvier D, Cech M, Chilton J, Clements D, Coraor N, Grüning BA, Guerler A, Hillman-Jackson J, Hiltmann S, Jalili V, Rasche H, Soranzo N, Goecks J, Taylor J, Nekrutenko A, Blankenberg D. The Galaxy platform for accessible, reproducible and collaborative biomedical analyses: 2018 update. *Nucleic Acids Res.* 2018 Jul 2;46(W1):W537-W544. doi: 10.1093/nar/gky379.
2. Altschul SF, Gish W, Miller W, Myers EW, Lipman D J. Basic local alignment search tool. *J Mol Biol.* 1990 Oct 5;215(3):403-10. doi: 10.1016/S0022-2836(05)80360-2.
3. Árnason Ú. Comparative chromosome studies in Pinnipedia. *Hereditas.* 1974. 76: 179–225. doi: 10.1111/j.1601-5223.1974.tb01340.x
4. Baird A, Barsby T, Guest DJ. Derivation of Canine Induced Pluripotent Stem Cells. *Reprod Domest Anim.* 2015 Aug;50(4):669-76. doi: 10.1111/rda.12562
5. Beklemisheva V.R., Menzorov A.G. Use of a Sendai virus based vector for efficient transduction of pinniped fibroblasts. *Vavilovskii Zhurnal Genetiki i Seleksii = Vavilov Journal of Genetics and Breeding.* 2018;22(8):10201025. doi: 10.18699/VJ18.445 (in Russian)

6. Beklemisheva VR, Perelman PL, Lemskaya NA, Proskuryakova AA, Serdyukova NA, Burkanov VN, Gorshunov MB, Ryder O, Thompson M, Lento G, O'Brien SJ, Graphodatsky AS. Karyotype Evolution in 10 Pinniped Species: Variability of Heterochromatin versus High Conservatism of Euchromatin as Revealed by Comparative Molecular Cytogenetics. *Genes (Basel)*. 2020 Dec 10;11(12):1485. doi: 10.3390/genes11121485
7. Camacho C, Coulouris G, Avagyan V, Ma N, Papadopoulos J, Bealer K, Madden TL. BLAST+: architecture and applications. *BMC Bioinformatics*. 2009 Dec 15;10:421. doi: 10.1186/1471-2105-10-421.
8. Choppa PC, Vojdani A, Tagle C, Andrin R, Magtoto L. Multiplex PCR for the detection of *Mycoplasma fermentans*, *M. hominis* and *M. penetrans* in cell cultures and blood samples of patients with chronic fatigue syndrome. *Mol Cell Probes*. 1998 Oct;12(5):301-8.
9. Dutton L, Dudhia J, Guest DJ, Connolly DJ. Inducing pluripotency in the domestic cat (*Felis Catus*). *Stem Cells Dev*. 2019 Aug 7. doi: 10.1089/scd.2019.0142
10. Gao J, Petraki S, Sun X, Brooks LA, Lynch TJ, Hsieh C-L, Elteriefi R, Lorenzana Z, Punj V, Engelhardt JF, Parekh KR, Ryan AL. Derivation of Induced Pluripotent Stem Cells From Ferret Somatic Cells. *Am J Physiol Lung Cell Mol Physiol*. 2020 Apr 1;318(4):L671-L683. doi: 10.1152/ajplung.00456.2019
11. Gómez MC, Serrano MA, Pope CE, Jenkins JA, Biancardi MN, López M, Dumas C, Galiguis J, Dresser BL. Derivation of cat embryonic stem-like cells from in vitro-produced blastocysts on homologous and heterologous feeder cells. *Theriogenology*. 2010 Sep 1;74(4):498-515. doi: 10.1016/j.theriogenology.2010.05.023
12. Grabherr MG, Haas BJ, Yassour M, Levin JZ, Thompson DA, Amit I, Adiconis X, Fan L, Raychowdhury R, Zeng Q, Chen Z, Mauceli E, Hacohen N, Gnirke A, Rhind N, Palma F, Birren BW, Nusbaum C, Lindblad-Toh K, Friedman N, Regev A. Full-length transcriptome assembly from RNA-Seq data without a reference genome. *Nat Biotechnol*. 2011 May 15;29(7):644-52. doi: 10.1038/nbt.1883.
13. Graphodatsky AS, Perelman PL, O'Brien SJ. *Atlas of Mammalian Chromosomes*, 2nd Edition. Wiley-Blackwell, 2020:699.
14. Graphodatsky AS, Sablina OV, Meyer MN, Malikov VG, Isakova EA, Trifonov VA, Polyakov AV, Lushnikova TP, Vorobieva NV, Serdyukova NA, Perelman PL, Borodin PM, Benda P, Frynta D, Leikepová L, Munclinger P, Piálek J, Sádlová J, Zima J. Comparative

- Cytogenetics of Hamsters of the Genus *Calomyscus*. *Cytogenet Cell Genet.* 2000;88(3-4):296-304. doi: 10.1159/000015513
15. Graphodatsky AS, Yang F, O'Brien PC, Perelman P, Milne BS, Serdukova N, Kawada SI, Ferguson-Smith MA. Phylogenetic Implications of the 38 Putative Ancestral Chromosome Segments for Four Canid Species. *Cytogenet Cell Genet.* 2001;92(3-4):243-7. doi: 10.1159/000056911
  16. Haas BJ, Papanicolaou A, Yassour M, Grabherr M, Blood PD, Bowden J, Couger MB, Eccles D, Li B, Lieber M, MacManes MD, Ott M, Orvis J, Pochet N, Strozzi F, Weeks T, Westerman R, William T, Dewey CN, Henschel R, LeDuc RD, Friedman N, Regev A. De novo transcript sequence reconstruction from RNA-seq using the Trinity platform for reference generation and analysis. *Nat Protoc.* 2013 Aug;8(8):1494-512. doi: 10.1038/nprot.2013.084.
  17. Hayes B, Fagerlie SR, Ramakrishnan A, Baran S, Harkey M, Graf L, Bar M, Bendoraite A, Tewari M, Torok-Storb B. Derivation, characterization, and in vitro differentiation of canine embryonic stem cells. *Stem Cells.* 2008 Feb;26(2):465-73.
  18. Higuchi R. Rapid, efficient DNA extraction for PCR from cells or blood. *Amplifications (Perkin Elmer Cetus)* 1989;2:1-3.
  19. Huangfu D, Osafune K, Maehr R, Guo W, Eijkelenboom A, Chen S, Muhlestein W, Melton DA. Induction of pluripotent stem cells from primary human fibroblasts with only Oct4 and Sox2. *Nat Biotechnol.* 2008 Nov;26(11):1269-75. doi: 10.1038/nbt.1502
  20. Koh S, Thomas R, Tsai S, Bischoff S, Lim J-H, Breen M, et al: Growth requirements and chromosomal instability of induced pluripotent stem cells (iPSC) generated from adult canine fibroblasts. *Stem Cells Dev.* 2012, 22 (6): 951-963.
  21. Kojima Y, Kaufman-Francis K, Studdert JB, Steiner KA, Power MD, Loebel DA, Jones V, Hor A, de Alencastro G, Logan GJ, Teber ET, Tam OH, Stutz MD, Alexander IE, Pickett HA, Tam PP. The transcriptional and functional properties of mouse epiblast stem cells resemble the anterior primitive streak. *Cell Stem Cell.* 2014 Jan 2;14(1):107-20. doi: 10.1016/j.stem.2013.09.014
  22. Langmead B, Salzberg SL. Fast gapped-read alignment with Bowtie 2. *Nat Methods.* 2012;9(4):357-359. doi: 10.1038/nmeth.1923
  23. Lee AS1, Xu D, Plews JR, Nguyen PK, Nag D, Lyons JK, Han L, Hu S, Lan F, Liu J, Huang M, Narsinh KH, Long CT, de Almeida PE, Levi B, Kooreman N, Bangs C, Pacharinsak C, Ikeno F, Yeung AC, Gambhir SS, Robbins RC, Longaker MT, Wu JC. Preclinical derivation and



- imaging of autologously transplanted canine induced pluripotent stem cells. *J Biol Chem.* 2011 Sep 16;286(37):32697-704. doi: 10.1074/jbc.M111.235739
24. Luo J, Suhr ST, Chang EA, Wang K, Ross PJ, Nelson LL, Venta PJ, Knott JG, Cibelli JB. Generation of leukemia inhibitory factor and basic fibroblast growth factor-dependent induced pluripotent stem cells from canine adult somatic cells. *Stem Cells Dev.* 2011 Oct;20(10):1669-78. doi: 10.1089/scd.2011.0127.
25. Maherali N, Sridharan R, Xie W, Utikal J, Eminli S, Arnold K, Stadtfeld M, Yachechko R, Tchieu J, Jaenisch R, Plath K, Hochedlinger K. Directly reprogrammed fibroblasts show global epigenetic remodeling and widespread tissue contribution. *Cell Stem Cell.* 2007 Jun 7;1(1):55-70. doi: 10.1016/j.stem.2007.05.014
26. Mathew R, Jia W, Sharma A, Zhao Y, Clarke LE, Cheng X, Wang H, Salli U, Vrana KE, Robertson GP, Zhu J, Wang S. Robust activation of the human but not mouse telomerase gene during the induction of pluripotency. *FASEB J.* 2010 Aug;24(8):2702-15. doi: 10.1096/fj.09-148973
27. Menzorov AG, Matveeva NM, Markakis MN, Fishman VS, Christensen K, Khabarova AA, Pristyazhnyuk IE, Kizilova EA, Cirera S, Anistoroaei R, Serov OL. Comparison of American mink embryonic stem and induced pluripotent stem cell transcriptomes. *BMC Genomics.* 2015;16 Suppl 13:S6. doi: 10.1186/1471-2164-16-S13-S6
28. Menzorov AG, Orishchenko KE, Fishman VS, Shevtsova AA, Mungalov RV, Pristyazhnyuk IE, Kizilova EA, Matveeva NM, Alenina N, Bader M, Rubtsov NB, Serov OL. Targeted genomic integration of EGFP under tubulin beta 3 class III promoter and mEos2 under tryptophan hydroxylase 2 promoter does not produce sufficient levels of reporter gene expression. *J Cell Biochem.* 2019 Oct;120(10):17208-17218. doi: 10.1002/jcb.28981
29. Okita K, Ichisaka T, Yamanaka S. Generation of germline-competent induced pluripotent stem cells. *Nature.* 2007 Jul 19;448(7151):313-7.
30. Perteau M, Perteau GM, Antonescu CM, Chang T-C, Mendell JT, Salzberg SL. StringTie enables improved reconstruction of a transcriptome from RNA-seq reads. *Nature Biotechnology.* 2015 Mar;33(3):290-5. doi: 10.1038/nbt.3122.
31. Rouvinen-Watt K, Harris L, Dick M, Pal C, Lei S, Mustonen AM, Nieminen P. Role of hepatic de novo lipogenesis in the development of fasting-induced fatty liver in the American mink (*Neovison vison*). *Br J Nutr.* 2012 Oct 28;108(8):1360-70. doi: 10.1017/S0007114511006775

32. Schiebinger G, Shu J, Tabaka M, Cleary B, Subramanian V, Solomon A, Gould J, Liu S, Lin S, Berube P, Lee L, Chen J, Brumbaugh J, Rigollet P, Hochedlinger K, Jaenisch R, Regev A, Lander ES. Optimal-Transport Analysis of Single-Cell Gene Expression Identifies Developmental Trajectories in Reprogramming. *Cell*. 2019 Feb 7;176(4):928-943.e22. doi: 10.1016/j.cell.2019.01.006.
33. Seabright M. A Rapid Banding Technique for Human Chromosomes. *Lancet*. 1971 Oct 30;2(7731):971-2. doi: 10.1016/s0140-6736(71)90287-x
34. Seppey M., Manni M., Zdobnov E.M. BUSCO: Assessing Genome Assembly and Annotation Completeness. In: Kollmar M. (eds) *Gene Prediction. Methods in Molecular Biology*, vol 1962. Humana, New York, NY. 2019. doi.org/10.1007/978-1-4939-9173-0\_14.
35. Shimada H, Nakada A, Hashimoto Y, Shigeno K, Shionoya Y, Nakamura T. Generation of canine induced pluripotent stem cells by retroviral transduction and chemical inhibitors. *Mol Reprod Dev*. 2010 Jan;77(1):2. doi: 10.1002/mrd.21117
36. Stanyon R, Galleni L. A rapid fibroblast culture technique for high resolution karyotypes. *Italian Journal of Zoology*. 1991;58(1):81-83. doi:10.1080/11250009109355732
37. Tsukamoto M, Nishimura T, Yodoe K, Kanegi R, Tsujimoto Y, Alam ME, Kuramochi M, Kuwamura M, Ohtaka M, Nishimura K, Nakanishi M, Inaba T, Sugiura K, Hatoya S. Generation of Footprint-Free Canine Induced Pluripotent Stem Cells Using Auto-Erasable Sendai Virus Vector. *Stem Cells Dev*. 2018 Nov 15;27(22):1577-1586. doi: 10.1089/scd.2018.0084
38. Vaags AK, Rosic-Kablar S, Gartley CJ, Zheng YZ, Chesney A, Villagómez DA, Kruth SA, Hough MR. Derivation and characterization of canine embryonic stem cell lines with in vitro and in vivo differentiation potential. *Stem Cells*. 2009 Feb;27(2):329-40. doi: 10.1634/stemcells.2008-0433
39. Verma R, Holland MK, Temple-Smith P, Verma PJ. Inducing pluripotency in somatic cells from the snow leopard (*Panthera uncia*), an endangered felid. *Theriogenology*. 2012 Jan 1;77(1):220-8, 228.e1-2. doi: 10.1016/j.theriogenology.2011.09.022
40. Verma R, Liu J, Holland MK, Temple-Smith P, Williamson M, Verma PJ. Nanog is an essential factor for induction of pluripotency in somatic cells from endangered felids. *Biores Open Access*. 2013 Feb;2(1):72-6. doi: 10.1089/biores.2012.0297

41. Wernig M, Meissner A, Foreman R, Brambrink T, Ku M, Hochedlinger K, Bernstein BE, Jaenisch R. In vitro reprogramming of fibroblasts into a pluripotent ES-cell-like state. *Nature*. 2007 Jul 19;448(7151):318-24.
42. Whitworth DJ, Ovchinnikov DA, Wolvetang EJ: Generation and Characterization of LIF-dependent Canine Induced Pluripotent Stem Cells from Adult Dermal Fibroblasts. *Stem Cells Dev*. 2012, 21 (12): 2288-2297.
43. Wilcox JT, Semple E, Gartley C, Brisson BA, Perrault SD, Villagómez DA, Tayade C, Becker S, Lanza R, Betts DH. Characterization of canine embryonic stem cell lines derived from different niche microenvironments. *Stem Cells Dev*. 2009 Oct;18(8):1167-78. doi: 10.1089/scd.2008.0336
44. Xu RH, Chen X, Li DS, Li R, Addicks GC, Glennon C, Zwaka TP, Thomson JA. BMP4 initiates human embryonic stem cell differentiation to trophoblast. *Nat Biotechnol*. 2002 Dec;20(12):1261-4.
45. Yang F, O'Brien PC, Milne BS, Graphodatsky AS, Solanky N, Trifonov V, Rens W, Sargan D, Ferguson-Smith MA. A Complete Comparative Chromosome Map for the Dog, Red Fox, and Human and Its Integration With Canine Genetic Maps. *Genomics* 1999 Dec 1;62(2):189-202. doi: 10.1006/geno.1999.5989
46. Ye J, Coulouris G, Zaretskaya I, Cutcutache I, Rozen S, Madden TL. Primer-BLAST: a tool to design target-specific primers for polymerase chain reaction. *BMC Bioinformatics*. 2012 Jun 18;13:134. doi: 10.1186/1471-2105-13-134.

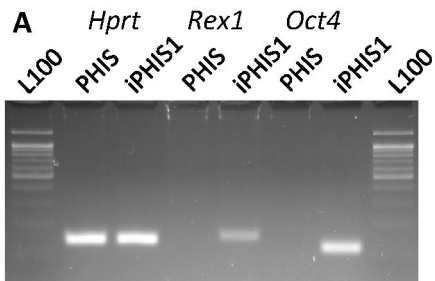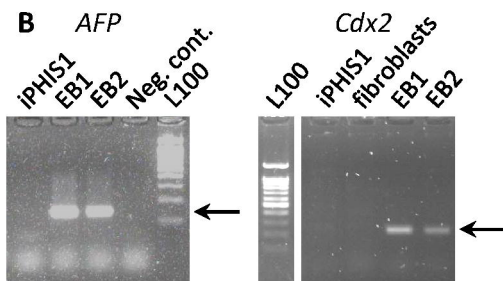

**C** iPHIS1

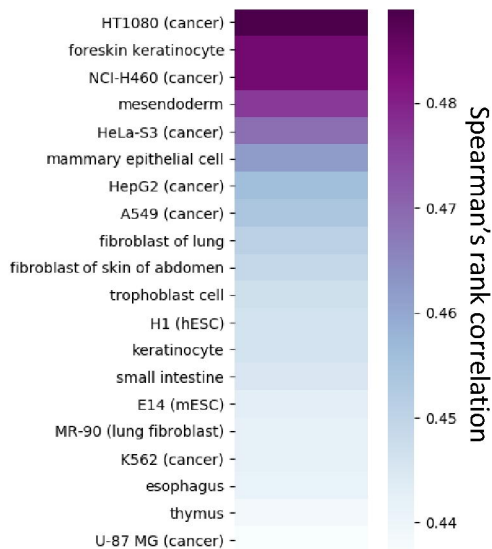

**D** E14 (mouse ES cells)

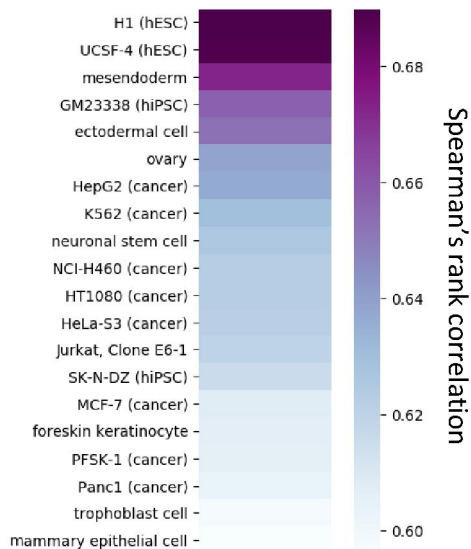

## A Experiment outline

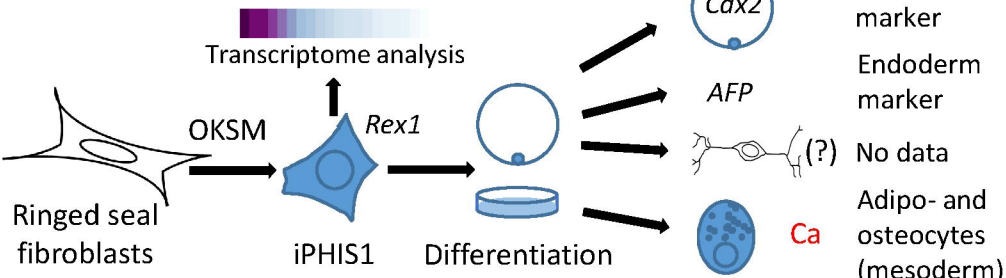

## B iPHIS1 colony on day 23 (before the pick up)

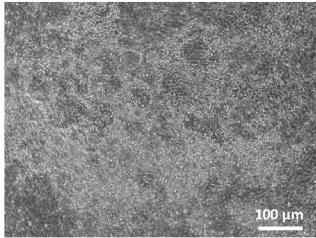

## C iPHIS1 on feeder, passage 11

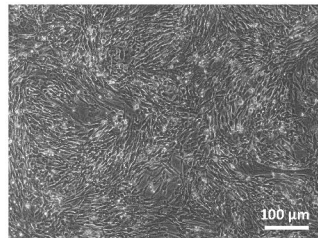

## D iPHIS1 on gelatin without feeder, passage 11

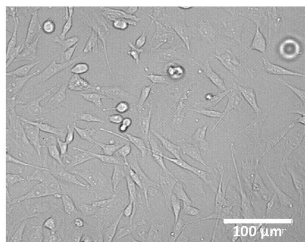

## E Overgrown iPHIS1 forms “bubbles”, similar to mink iPS cells

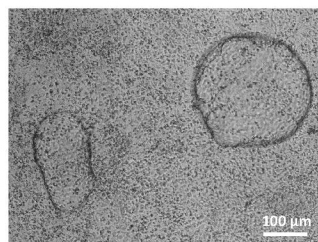

## F iPHIS1 “embryoid bodies”, day 17

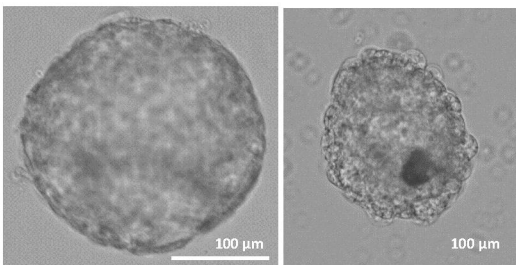

## G Differentiation into adipocytes

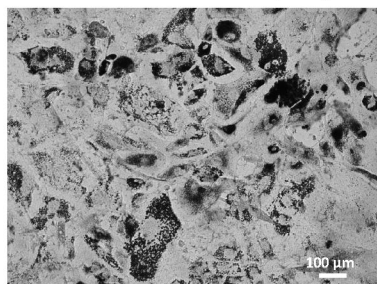

## H Differentiation into osteocytes

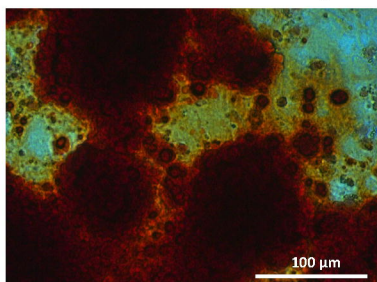

## I iPHIS1 karyotype

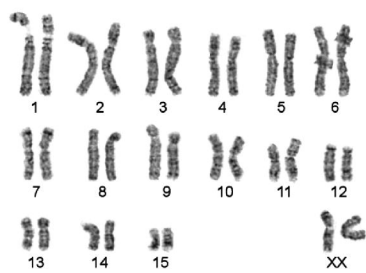

Source: https://www.biorxiv.org/content/biorxiv/early/2021/05/06/2020.05.20.105890.full.pdf
